# Supplementary material
Source: MDPI journal article supplement (https://www.mdpi.com/2072-4292/13/21/4440)
Supplement: s1 [file s1]

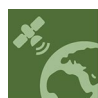**Table S1.** Correlation matrix of IRSEI and four factors

| Year | Indicator         | NDVI  | WET   | NDBSI | LST   | IRSEI |
|------|-------------------|-------|-------|-------|-------|-------|
| 1995 | NDVI              | 1.00  | 0.26  | −0.44 | −0.26 | 0.62  |
|      | WET               | 0.25  | 1.00  | −0.61 | −0.42 | 0.78  |
|      | NDBSI             | −0.52 | −0.62 | 1.00  | 0.19  | −0.90 |
|      | LST               | −0.23 | −0.49 | 0.14  | 1.00  | −0.49 |
|      | Average Relevance | 0.32  | 0.43  | 0.44  | 0.29  | 0.70  |
| 2005 | NDVI              | 1.00  | 0.39  | −0.31 | −0.14 | 0.65  |
|      | WET               | 0.37  | 1.00  | −0.49 | −0.30 | 0.81  |
|      | NDBSI             | −0.40 | −0.40 | 1.00  | 0.21  | −0.78 |
|      | LST               | −0.12 | −0.34 | 0.26  | 1.00  | −0.37 |
|      | Average Relevance | 0.28  | 0.39  | 0.34  | 0.24  | 0.65  |
| 2015 | NDVI              | 1.00  | 0.52  | −0.19 | −0.01 | 0.77  |
|      | WET               | 0.50  | 1.00  | −0.36 | −0.12 | 0.83  |
|      | NDBSI             | −0.28 | −0.27 | 1.00  | 0.33  | −0.65 |
|      | LST               | 0.01  | −0.22 | 0.39  | 1.00  | −0.25 |
|      | Average Relevance | 0.24  | 0.33  | 0.29  | 0.20  | 0.63  |
| 2020 | NDVI              | 1.00  | 0.52  | −0.19 | 0.19  | 0.88  |
|      | WET               | 0.60  | 1.00  | −0.26 | −0.07 | 0.84  |
|      | NDBSI             | −0.17 | −0.17 | 1.00  | 0.44  | −0.55 |
|      | LST               | 0.18  | −0.12 | 0.49  | 1.00  | −0.14 |
|      | Average Relevance | 0.30  | 0.31  | 0.26  | 0.26  | 0.60  |

Total Average Relevance

NDVI=0.28 WET=0.36 NDBSI=0.33 LST=0.25 IRSEI=0.64

Note: IRSEI, Improved Remote sensing ecological Index. Average correlation is based on a certain indicators and other indicators to calculate the absolute values of the correlation coefficient of NDVI (1995) =  $(|0.25| + |-0.52| + |-0.23|) / 3 = 0.32$ .
